# Supplementary material for: Suppression of transcytosis regulates zebrafish blood-brain barrier function
Source: eLife. 2019 Aug 20;8:e47326. doi: 10.7554/eLife.47326 (PMC6726461; doi:10.7554/eLife.47326)
Supplement: Figure 1—source data 1. [file elife-47326-fig1-data1.xlsx]

## Sheet: Figure 1
midbrain	1 kDa NHS																						10 kDa Dextran																						80 kDa DBP-EGFP
3 dpf	8.704	15.6678	8.80846	10.035	11.0814	6.46672	9.42812	5.44145	4.5554	10.1873	11.3346	6.73022	7.5937	6.74505	6.46438	8.83181	14.2341	6.77263	5.69774	5.99877			4.42914	5.37644	5.57841	5.67128	6.04977	6.05051	6.68009	8.05631	8.07478	9.42812	12.6912	14.5397	14.6912	15.3965	5.46322	6.19496	6.54378	6.3383	3.85244	12.0365			4.23133	4.75315	5.07988	6.3293	6.82892
4 dpf	3.29535	4.57018	4.86461	5.17742	5.31965	5.72232	7.11197	8.04299	8.35337	8.66465	8.69819	6.54	6.12	7.85	9.19871	10.1118	11.2341	12.0433	8.79544	10.2634			2.13325	2.42293	3.1817	3.43134	4.18543	4.4047	5.96521	6.04343	6.90852	6.98367	8.88585	9.67604	9.98039	9.22	10.4792	12.289	12.189	13.0666	8.921	9.9912			1.3464	2.02265	2.35296	5.50209	5.59578
5 dpf	4.5452	4.8015	1.6475	3.5567	3.961	3.55	0.9033	1.66	2.2567	2.5772	2.7534	3.3552	3.4139	3.7004	3.7323	4.4592	4.5826	5.6192	1.992	3.493			5.9468	3.3872	4.36	3.8267	4.2102	2.5288	4.583	3.6368	2.0599	2.0957	2.51	2.6445	2.964	2.988	3.5982	3.6651	3.7628	4.2125	4.3641	4.6569			1.925	2.2945	2.4729	2.5995	3.6276
6 dpf	1.78	2.21	2.65	2.74	2.96	3.02	3.28	3.92	4.13	4.52	5.41	1.58	2.07	2.36	2.97	2.56	3.11	3.08	2.92	4.43	4.18		1.9629	2.0502	2.4605	2.492	2.9307	2.9431	2.9795	3.2443	3.4715	3.9815	5.4542	4.0963	2.1502	2.246	2.5492	2.3931	2.9431	3.7947	3.1443	3.1715			0.5556	0.732	2.4063	2.7628	2.8893
10 dpf	1.67217	1.78915	2.76998	2.85943	3.14365	3.67897	3.72336	3.85909	1.08202	4.24254	4.25422	3.27131	4.81051	2.82003	4.83735	2.90909	5.3801	2.65347	5.694	1.07172			1.48008	0.975928	1.1431	3.32851	1.42895	1.56913	2.63172	2.21104	2.28254	4.29106	2.36177	2.37157	2.41238	2.5683	2.72078	3.43113	3.87927	4.17317	5.78716	3.789			0.582251	0.67603	0.858632	0.896015	1.02288
Supplement 1
hindbrain	1 kDa NHS																						10 kDa Dextran																						80 kDa DBP-EGFP
3 dpf	6.41835	5.2819	5.41385	6.88767	7.106	7.16912	7.21312	7.4321	7.56001	8.23466	9.67516	9.77819	5.89273	6.00463	9.76341	8.78044	7.04392	6.09904	6.24613	10.7802			7.78436	8.27344	4.06293	4.88339	7.15167	5.336	5.80512	5.85596	6.27463	7.21312	10.1139	11.8864	1.56725	1.95838	2.37565	2.80339	2.90639	3.30587	4.2826	6.16411			2.49811	3.41155	4.0954	4.31446	5.23764
4 dpf	2.5727	6.86687	2.89723	3.00239	3.06609	3.24122	3.64295	3.66999	3.81019	3.99372	4.1403	4.52569	4.71254	4.42569	4.333	4.81436	5.23142	5.38852	2.8972	4.398			1.08608	1.19386	1.32083	2.2904	2.65527	2.69596	3.74737	2.49502	5.52285	6.03973	4.44412	3.90252	5.891	3.647	7.008	7.07428	2.16137	7.6578	4.34	2.341			1.18999	2.1427	2.65687	2.85044	3.17554
5 dpf	4.9936	0.8701	1.7378	4.0209	3.1371	5.1246	1.2983	3.3758	1.3354	0.7347	0.8572	1.0995	1.5233	1.9538	2.5151	3.5142	3.5538	3.7365	4.2218	4.9053			5.0751	4.2343	4.1343	2.4552	1.0203	4.0393	0.8639	1.3381	1.5754	1.6544	2.4041	2.7705	3.2964	3.4629	3.7637	4.116	4.4056	4.9621	0.912	3.4298			1.6207	1.7613	2.0161	2.1104	2.2787
6 dpf	1.0369	0.81	1.367	1.4765	2.9475	2.874	2.09	3.15	2.25	3.0472	3.272	3.458	4.02	3.19	3.21	3.3053	3.9314	4.1884	4.2858	4.7329	5.6131		1.44	1.71	1.8	2.17	2.58	2.67	2.93	3.21	3.46	3.48	3.93	1.46	0.71	1.89	2.21	2.98	2.17	2.97	3.41	4.5			0.6815	1.2475	1.5919	1.7451	2.1493
10 dpf	1.45806	1.69255	2.27818	2.87028	2.96977	3.05881	3.20817	3.30558	3.62559	3.66993	1.9828	4.10463	2.27343	3.39799	4.52828	4.66451	4.75206	4.92255	5.2774	1.2892			4.85104	1.08319	1.08593	3.19726	1.31433	3.57237	1.76025	1.87493	1.99753	2.26048	2.30851	2.31539	2.62773	2.65873	2.77469	2.81012	3.25978	3.90291	4.81304	4.29			0.803873	1.03219	3.107	1.3455	2.389
[truncated: 10 more columns]
