# Supplementary material for: Suppression of transcytosis regulates zebrafish blood-brain barrier function
Source: eLife. 2019 Aug 20;8:e47326. doi: 10.7554/eLife.47326 (PMC6726461; doi:10.7554/eLife.47326)
Supplement: Figure 2—source data 1. [file elife-47326-fig2-data1.xlsx]

## Sheet: Figure 2
	3 dpf							5 dpf
Time (s)	Fish 1	Fish 2	Fish 3	Fish 4	Fish 5	Fish 6		Fish 1	Fish 2	Fish 3	Fish 4	Fish 5	Fish 6
0	0	0	0	0	0	0		0	0	0	0	0	0
31	-0.296	-1.214	0.217	0.0894	0.1	0.01005		0.3018	-0.995	-0.515	0.11534	-0.09263	0.1126
62	-0.501	-0.658	0.485	0.17875	0.1517	0.0201		0.1369	-0.836	-0.355	0.230681	-0.05751	0.1511
93	-0.213	-1.214	0.5975	0.26815	0.3035	0.7648		0.3082	0.1086	-1.124	0.346021	-0.11216	0.2031
124	-0.41	-1.214	0.8573	0.26815	0.4552	1.50955		0.2329	-0.195	-0.488	0.408265	-0.11703	0.2258
155	-0.334	-1.078	0.9717	0.5809	0.4552	1.34475		0.3357	-0.168	-0.789	0.470509	0.082313	0.3175
186	-0.202	-1.078	1.1953	0.5809	0.7587	1.18		0.6027	0.2669	-0.44	0.532753	-0.0887	0.2814
217	-0.707	-1.078	1.1989	0.9423	0.7587	2.3681		0.5742	0.0312	-0.271	0.478914	0.170348	0.3787
248	-0.386	0.7906	1.4806	0.9423	1.263	2.7964		-0.805	-0.145	-0.453	0.425074	0.101342	0.4669
279	-0.563	0.7906	1.6891	1.2474	1.263	3.22465		-1.311	0.4799	-0.234	0.371235	0.127489	0.4936
310	-0.4	0.7906	1.8534	1.2474	1.97	3.3995		-1.757	-0.0058	-0.32	0.568148	0.049645	0.5968
341	-0.344	1.0726	1.9817	1.55205	1.97	3.57435		-2.022	0.0677	0.2387	0.765061	0.0632	0.6354
372	-0.507	1.0726	2.0434	1.55205	2.4754	3.9497		-2.098	0.4392	0.1657	0.961973	0.143709	0.6374
403	-0.334	1.0726	2.187	1.7133	2.4754	4.3251		-2.155	0.0148	0.4476	0.797109	0.17177	0.7476
434	-0.281	1.0726	2.2442	1.7133	2.9463	4.70885		-1.968	0.3148	0.3712	0.632245	0.222572	0.7888
465	-0.131	1.4371	2.3983	1.98925	2.9463	5.0926		-1.831	0.2486	0.6757	0.467381	0.277691	0.9423
496	-0.126	1.4371	2.6428	1.98925	3.4245	5.0926		-1.672	0.0861	0.6513	0.563993	0.24701	1.0207
527	-0.202	1.4371	2.7032	2.0294	3.4245	5.2568		-1.332	-0.532	0.7394	0.660605	0.180254	0.9235
558	0.0961	1.4371	2.8068	2.0294	3.8975	5.42095		-1.173	-0.912	0.925	0.757217	0.267235	1.1211
589	-0.223	1.4371	3.1008	2.26755	3.8975	4.6612		-1.144	-1.072	0.705	0.768459	0.197603	1.1249
620	0.0342	1.2496	3.1755	2.26755	4.5281	3.90145		-0.66	-1.327	0.627	0.779702	0.205387	1.2732
651	0.2034	1.2496	3.5263	2.4063	4.5281	3.99375		-0.671	-1.468	0.8033	0.790944	0.28814	1.3262
682	0.1382	1.2496	3.7206	2.4063	4.9925	4.0861		-0.412	-1.417	0.8634	0.802186	0.365567	1.3494
713	0.1265	1.2496	3.8807	2.476	4.9925	3.9612		-0.187	-1.483	0.7629	0.813428	0.367871	1.3449
744	0.3297	2.2339	3.9493	2.476	5.578	3.8363		-0.131	-1.591	0.6163	0.824671	0.431326	1.4372
775	0.5048	2.2339	4.0645	2.54305	5.578	3.9344		0.00165	-1.535	0.7706	0.835913	0.307026	1.4568
806	0.3846	2.2339	4.3342	2.54305	6.3445	4.0325		0.0114	-1.514	0.5297	0.847155	0.420145	1.2663
837	0.3176	2.2339	4.4301	2.66925	6.3445	4.47395		0.2068	-1.493	0.3288	0.858397	0.495305	1.3102
868	0.7907	1.1278	4.4389	2.66925	6.7522	4.9154		0.4601	-1.556	0.8527	0.86964	0.456275	1.2367
899	0.6537	1.1278	4.3856	2.7352	6.7522	5.5019		0.5574	-1.619	0.2419	0.880882	0.433848	1.3409
930	0.6531	1.1278	4.5278	2.7352	7.2642	6.08845		0.6362	-1.619	0.3386	0.892124	0.442539	1.3735
961	0.7815	1.1278	4.7057	2.8401	7.2642	6.00545		0.6099	-1.62	0.4507	0.903366	0.56128	1.23
992	0.8362	1.9955	4.8793	2.8401	7.6113	5.92245		0.7937	-1.572	0.5263	0.914609	0.583078	1.3755
1023	0.9506	1.9955	4.9998	3.2031	7.6113	6.1255		0.8731	-1.524	0.1364	0.925851	0.569711	1.3692
1054	1.1083	1.9955	4.9238	3.2031	7.708	6.3286		0.8467	-1.537	0.4305	0.937093	0.637606	1.3396
1085	1.4645	1.9955	5.2094	3.24685	7.708	6.19745		1.0319	-1.551	0.00898	0.948336	0.471849	1.3747
1116	1.1462	1.0586	5.1784	3.24685	7.9005	6.0663		1.1247	-1.561	0.37	0.959578	0.581251	1.3443
1147	0.9017	1.0586	5.1803	3.40745	7.9005	6.3169		1.0938	-1.572	0.0692	0.97082	0.515479	1.1501
1178	1.4506	1.0586	5.2887	3.40745	7.9733	6.5675		1.3104	-1.506	0.1914	0.982062	0.474964	1.2534
1209	1.4085	1.0586	5.5397	3.72945	7.9733	6.76455		1.3281	-1.439	-0.207	0.993305	0.591731	1.3566
1240	1.4592	2.0762	5.5418	3.72945	7.9904	6.9616		1.3222	-1.547	0.0545	1.00455	0.49513	1.0583
1271	1.5707	2.0762	5.7619	3.8675	7.9904	6.83615		1.3636	-1.655	0.0628	1.01579	0.663088	1.155
1302	1.8093	2.0762	5.9551	3.8675	7.9992	6.7107		1.4544	-1.628	-0.176	1.02703	0.676386	1.1105
1333	1.5959	2.0762	5.9062	4.07365	7.9992	6.6391		1.4242	-1.601	-0.193	1.03827	0.499437	1.0801
1364	1.8539	1.4697	5.9551	4.07365	8.0037	6.5675		1.636	-1.643	-0.205	1.04952	0.714499	1.0498
1395	1.6634	1.4697	6.1078	4.2707	8.0037	6.44805		1.7573	-1.686	-0.041	1.06076	0.694204	0.9581
1426	1.5652	1.4697	6.1387	4.2707	8.0489	6.3286		1.7169	-1.685	-0.472	1.072	0.65416	0.3353
1457	1.9003	1.4697	5.9703	4.41305	8.0489	6.2798		2	-1.684	-0.56	1.08324	0.642033	0.928
1488	1.894	1.8142	6.103	4.41305	8.1401	6.23105		2.0802	-1.703	-0.649	1.09449	0.605582	0.9176
1519	1.8325	1.8142	6.3799	4.5853	8.1401	6.14865		2.0534	-1.722	-0.489	1.10573	0.651404	0.9073
1550	1.6596	1.8142	6.5497	4.5853	8.2841	6.0663		2.2406	-1.719	-0.399	1.11697	0.665213	0.1681
1581	1.8748	1.8142	6.7072	4.71985	8.2841	5.90515		2.3652	-1.717	-0.147	1.12821	0.79772	0.7399
1612	1.7718	2.815	6.8525	4.71985	8.5667	5.744		2.4898	-1.734	-0.358	1.13945	0.745441	0.7325
1643	1.8538	2.815	7.0778	4.9283	8.5667	5.3366		2.5884	-1.752	-0.332	1.1507	0.643493	0.7357
1674	1.8048	2.815	7.1291	4.9283	8.6657	4.9292		2.687	-1.838	-0.362	1.1507	0.710904	0.739
1705	1.8592	2.815	7.2012	5.1409	8.6657	5.1191		2.7807	-1.925	-0.226	1.29787	0.719183	0.8304
1736	1.4752	3.8524	7.2716	5.1409	8.8521	5.309		2.8744	-1.908	-0.252	1.44504	0.727463	0.5021
1767	1.3006	3.8524	7.5864	5.2393	8.8521	5.2931		2.9681	-1.892	-0.179	1.59221	0.802386	0.7237
1798	1.3285	3.8524	7.5149	5.2393	8.8945	5.27715		3.0618	-1.954	-0.34	1.60512	0.877309	0.696
1829	0.9535	3.8524	7.686	5.3198	8.8945	5.19425		3.1555	-2.015	-0.225	1.61802	0.909446	0.6684
1860	1.622	4.2593	7.6659	5.3198	9.1117	5.1113		3.2492	-2.022	-0.256	1.63093	0.941583	0.5651
1891	1.7561	4.2593	7.991	5.3198	9.1117	5.1251		3.3429	-2.028	-0.064	1.67533	0.998203	0.6134
1922	1.4745	4.2593	8.1882	5.3797	9.2737	5.1389		3.4366	-2.004	-0.015	1.71973	1.05482	0.6978
1953	1.7821	4.2593	8.3113	5.43955	9.2737	5.0467		3.5302	-1.98	0.0879	1.76413	1.05691	0.6648
1984	1.9365	3.3657	8.7853	5.5593	9.3188	4.9545		3.6239	-1.91	0.0742	1.76899	1.05899	0.6318
2015	1.3923	3.3657	8.9545	5.5593	9.3188	4.95935		3.7176	-1.84	0.0844	1.77384	1.0774	0.6447
2046	1.7737	3.3657	8.6229	5.58885	9.4308	4.96415		3.8113	-1.88	0.2502	1.7787	1.09582	0.6368
2077	1.9019	3.3657	8.9203	5.61835	9.5427	5.0051		3.905	-1.921	0.1827	1.73418	1.06547	0.7395
2108	1.9389	3.8164	8.7127	5.6774	9.7666	5.046		3.9987	-1.846	0.2877	1.68966	1.03513	0.6733
2139	1.8297	3.8164	8.9618	5.6774	9.7666	5.0244		4.0924	-1.771	0.4205	1.64514	1.09728	0.607
2170	1.7757	3.8164	8.7745	5.68535	9.8413	5.0028		4.1861	-1.687	0.3837	1.60094	1.15944	0.5148
2201	2.1725	4.3595	8.9409	5.6933	9.916	4.95455		4.2797	-1.602	0.4454	1.55674	1.18511	0.5795
2232	2.1473	4.3595	8.8397	5.70925	10.0653	4.9063		4.3734	-1.586	0.4632	1.51254	1.21078	0.3901
2263	1.9019	4.3595	9.2414	5.70925	10.0653	4.9725		4.4671	-1.569	0.4959	1.52073	1.21967	0.471
2294	1.9526	4.9061	8.9585	5.7598	10.103	5.03875		4.5608	-1.5	0.5313	1.52892	1.22856	0.5519
2325	1.8578	4.9061	9.309	5.8103	10.1407	5.0216		4.6545	-1.43	0.5666	1.53711	1.28232	0.5076
2356	2.0734	4.9061	9.3133	5.9114	10.216	5.00445		4.7482	-1.317	0.5666	1.45769	1.33608	0.4873
2387	2.1143	3.5951	9.2799	5.9114	10.216	5.0397		4.8419	-1.204	0.5666	1.37827	1.34327	0.5219
2418	1.9803	3.5951	9.5953	5.9412	10.3241	5.075		4.8571	-1.109	0.7056	1.29885	1.35046	0.4856
2449	2.1723	3.5951	9.5154	5.97105	10.4321	5.15635		4.9071	-1.015	0.7504	1.35596	1.37451	0.4494
2480	2.2296	5.0577	9.4966	6.03065	10.6482	5.23775		4.852	-0.989	0.7504	1.41308	1.39856	0.4602
2511	2.1476	5.0577	9.5169	6.03065	10.6482	5.26175		4.9608	-0.963	0.8851	1.47019	1.41157	0.4987
2542	2.2266	5.0577	9.7071	6.12845	10.664	5.28575		4.8507	-0.794	0.8556	1.4466	1.40831	0.4415
2573	2.2437	4.7179	9.5777	6.22625	10.6797	5.32795		4.8518	-0.624	0.8556	1.42301	1.41189	0.4526
2604	2.4856	4.7179	9.9187	6.4218	10.7111	5.37015		4.7979	-0.466	0.7673	1.39942	1.4506	0.4637
2635	2.3904	4.7179	9.8541	6.4218	10.7111	5.49205		4.5957	-0.308	0.7673	1.33054	1.39856	0.4282
2666	2.5111	5.0609	10.209	6.43845	10.8393	5.6139		4.7735	-0.208	0.7673	1.26167	1.42262	0.47
2697	2.5595	5.0609	9.9949	6.4551	10.9674	5.60575		4.7599	-0.108	0.8607	1.19279	1.49483	0.4456
2728	2.5097	5.0609	10.1391	6.48835	11.2237	5.59755		4.4863	0.0125	0.9542	1.27681	1.49483	0.4337
2759	2.5523	5.0049	9.8098	6.48835	11.2237	5.71775		4.3815	0.1333	0.8607	1.36082	1.49483	0.4219
2790	2.6023	5.0049	9.8203	6.53475	11.4035	5.83795		4.5973	0.323	1.1411	1.44484	1.4886	0.4863
2821	2.6836	5.0049	9.9695	6.5811	11.5833	5.90155		4.5165	0.5127	1.2179	1.42363	1.48394	0.4522
2852	2.6841	5.0049	9.9921	6.67385	11.9428	5.9652		4.4856	0.6165	1.2789	1.40242	1.47794	0.4977
2883	2.9194	4.7786	10.0272	6.67385	11.9428	6.1232		4.3651	0.7203	1.2789	1.38121	1.46994	0.4636
2914	2.6071	4.7786	10.3056	6.71915	11.988	6.2812		4.4808	0.8765	1.2789	1.41823	1.46994	0.4294
2945	2.8496	4.7786	10.2705	6.7644	12.0332	6.42445		4.3911	1.0326	1.4622	1.45525	1.45996	0.4837
2976	2.7476	4.7786	10.5558	6.85495	12.1237	6.56765		4.483	1.0421	1.4508	1.49227	1.47978	0.3906
3007	3.3455	5.7949	10.5984	6.85495	12.1237	6.71595		4.4855	1.0516	1.4394	1.47319	1.46994	0.4392
3038	3.0582	5.7949	10.5327	6.89315	12.2281	6.8642		4.3297	1.3051	1.5524	1.4541	1.43	0.4624
3069	3.0885	5.5356	10.7616	6.93135	12.3325	6.98825		4.5134	1.5585	1.6654	1.43502	1.53923	0.4857
3100	2.988	5.5356	10.5008	7.00775	12.5413	7.1123		4.5903	1.7342	1.7785	1.3503	1.55992	0.5032
3131	2.9175	5.5356	10.9706	7.00775	12.5413	7.17285		4.6585	1.9098	1.8915	1.26558	1.58061	0.4265
3162	3.2527	5.9088	10.8611	7.07945	12.6535	7.23345		4.5756	1.9685	1.8789	1.18087	1.6013	0.5393
3193	3.5001	5.9088	10.916	7.15115	12.7657	7.4446		4.8597	2.0271	1.8662	1.30186	1.62199	0.5335
3224	3.6523	5.9088	11.0197	7.2946	12.99	7.65575		4.7669	2.0857	1.9471	1.42285	1.64268	0.5276
3255	3.3328	5.5521	11.0994	7.2946	12.99	7.68475		4.8566	2.1443	2.028	1.54384	1.66337	0.5867
3286	3.2488	5.5521	11.1791	7.35995	13.0517	7.71375		4.8507	2.2029	2.0369	1.52062	1.66337	0.5796
3317	3.4414	5.5521	11.4723	7.4253	13.1135	7.72855		4.8354	2.2615	2.0459	1.49739	1.78962	0.562
3348	3.2456	6.125	11.0669	7.55605	13.237	7.74335		4.9159	2.3202	2.0548	1.47416	1.78962	0.5512
3379	3.2042	6.7179	11.4228	7.55605	13.237	7.943		4.9008	2.3788	2.0638	1.49383	1.78962	0.5403
3410	3.6349	6.7179	11.4045	7.5602	13.4328	8.1426		4.885	2.4166	2.0592	1.5135	1.92295	0.5786
3441	3.5063	7.9149	11.2538	7.56435	13.6287	8.1574		5.0268	2.4545	2.0546	1.53316	1.92295	0.6313
3472	3.4335	7.9149	11.4443	7.57265	14.0205	8.3689		5.2469	2.4924	2.05	1.49164	1.92295	0.5805
3503	4.0665	6.0592	11.4884	7.57265	14.0205	8.58045		5.2428	2.5303	2.0454	1.45012	1.81513	0.5901
3534	3.9136	6.0592	11.4128	7.67015	14.12	8.74655		5.2629	2.5681	2.098	1.40859	1.81513	0.5997
3565	3.8343	6.0592	11.3903	7.76765	14.2196	8.91265		5.0962	2.606	2.1505	1.39095	1.81513	0.5586
3596	3.7999	8.1291	11.4789	7.96265	14.4187	8.93435		5.2648	2.6439	2.2031	1.3733	2.03859	0.5272
3627	4.0214	8.1291	11.5696	7.96265	14.4187	9.41065		5.3114	2.6817	2.2556	1.35565	2.03859	0.6683
