# Supplementary material for: Suppression of transcytosis regulates zebrafish blood-brain barrier function
Source: eLife. 2019 Aug 20;8:e47326. doi: 10.7554/eLife.47326 (PMC6726461; doi:10.7554/eLife.47326)
Supplement: Figure 3—source data 1. [file elife-47326-fig3-data1.xlsx]

## Sheet: Figure 3
Basement Membrane Gold Intensity
3 dpf				5 dpf				7 dpf
Fish 1	Fish 2	Fish 3	Fish 4	Fish 1	Fish 2	Fish 3	Fish 4	Fish 1	Fish 2	Fish 3	Fish 4
1.31138	1.21875	0.878049	0.995238	0.8	0.819512	0.807175	0.614907	0.932927	0.926605	1.08021	1.133
0.987097	0.976077	1.16149	0.980132	0.903226	0.776	0.841176	0.913043	0.853659	0.912568	0.973684	0.58125
1.22951	1.08257	1.25676	1.2197	0.902913	1.17582	0.533981	0.829876	0.893939	0.95098	0.898026	0.77957
1.3	1.5748	1.55789	1.16535	0.830325	0.98209	0.924171	0.834197	0.891892	0.869565	1.26506	1.08696
0.822485	1.05641	1.93976	1.16667	0.755365	0.805085	0.875622	0.969492	0.988281	0.876238	0.824742	0.918239
1.15179	1.58879	0.954887	1.06806	0.718631	0.946237	0.745614	0.767932	0.733333	0.776256	0.836364	0.964706
1.30909	2.69863	1.15306	0.929825	1.16438	0.796813	0.901042	0.872881	0.713004	0.9819	1.06433	0.873171
1.20192	1.37647	1.04525	0.8625	0.785	0.731707	0.768182	0.995	0.943966	1.03111	0.982857	0.7
1.56923	2.72308	1.16585	1.235	1.11659	1.04737	0.821705	1.10363	0.928571	0.805714	0.92891	1.17949
0.924731	2.12025	1.83871	1.06569	0.694737	0.71028	0.793296	0.648148	0.801932	0.861635	0.792929	0.773684
1.1701	1.02381			0.588745			0.944444	1.03556		1.03349
1.42991	1.43357						1.08904			0.970954
1.4878
0.953488
1.72727
Luminal Vesicles
3 dpf				5 dpf				7 dpf
Fish 1	Fish 2	Fish 3	Fish 4	Fish 1	Fish 2	Fish 3	Fish 4	Fish 1	Fish 2	Fish 3	Fish 4
0.093668	0.105764	0.0736214	0	0	0	0	0	0	0	0	0
0.112041	0.117495	0.0810635	0	0	0	0	0	0	0	0	0
0.13328	0.126498	0.104674	0	0	0	0.0540103	0	0	0	0	0
0.15455	0.206663	0.116414	0.102291	0	0	0.0570841	0	0.0606095	0	0	0.0613572
0.162672	0.222875	0.149753	0.110574	0.0528989	0.0372412	0.12416	0.0304767	0.0631473	0	0	0.0832016
0.186881	0.233206	0.206143	0.165961	0.0780762	0.0446349	0.135146	0.0428633	0.0970379	0	0.0809192	0.106394
0.197082	0.304437	0.22675	0.173236	0.136584	0.0746826	0.153362	0.0513505	0.100804	0.0893735	0.0921914	0.113276
0.222657	0.398729	0.248488	0.252207	0.141774	0.0792896	0.173355	0.056123	0.115621	0.118106	0.0949848	0.180343
0.286279	0.45106	0.272628	0.29083	0.145719	0.0974564	0.176754	0.0776759	0.116135	0.166237	0.0951203	0.193181
0.290274	0.57196	0.450857	0.335036	0.149139	0.185014	0.286862	0.140017	0.162672	0.183318	0.113585	0.20982
0.324589				0.181835			0.306351	0.265675
0.432682
Abluminal Vesicles
3 dpf				5 dpf				7 dpf
Fish 1	Fish 2	Fish 3	Fish 4	Fish 1	Fish 2	Fish 3	Fish 4	Fish 1	Fish 2	Fish 3	Fish 4
0	0	0	0	0	0	0	0	0.0325733	0	0	0
0	0	0	0.037679	0	0	0	0	0.0369959	0	0	0
0.0775254	0.0662252	0.0478149	0.123442	0	0.035832	0	0	0.0475964	0	0	0
0.0968523	0.0777545	0.0760225	0.149582	0.0436376	0.045106	0	0	0.0649773	0	0	0.0371747
0.155557	0.0827472	0.153905	0.167563	0.0450369	0.082176	0	0	0.0797385	0.0742611	0	0.0440762
0.168322	0.103472	0.172418	0.185448	0.0857329	0.0884408	0	0.0388984	0.0843349	0.077815	0.0811622	0.0554939
0.215841	0.145212	0.229956	0.195433	0.0932836	0.0956846	0.0969368	0.0929714	0.110339	0.0791139	0.0820883	0.0683714
0.237637	0.238001	0.30863	0.196661	0.101116	0.139307	0.131721	0.0930665	0.139617	0.0960246	0.113045	0.0712555
0.260166	0.258298	0.522421	0.216124	0.144309	0.163733	0.188377	0.128626	0.155958	0.133014	0.133191	0.0939232
0.539541	0.327413	0.586968	0.2405	0.146929	0.209453	0.251425	0.143658	0.170955	0.178174	0.2001	0.222486
			0.304101	0.188164			0.190682	0.184621
			0.31506
