# Supplementary material for: Suppression of transcytosis regulates zebrafish blood-brain barrier function
Source: eLife. 2019 Aug 20;8:e47326. doi: 10.7554/eLife.47326 (PMC6726461; doi:10.7554/eLife.47326)
Supplement: Figure 4—source data 1. [file elife-47326-fig4-data1.xlsx]

## Sheet: Figure 4
	mfsd2aa								mfsd2ab
3 dpf	0.00449631	0	0	0	0	0.00534989	0		0.075795	0.0784049	0.096527	0.093488	0.0142103	0.0305217
5 dpf	0.109614	0.148895	0.113213	0.0492413	0.0948333	0.192138			0.102869	0.185937	0.100767	0.21735	0.0668893	0.21916
Adult	0.0277447	0.036034	0.0499523	0.0261152	0.00696709	0.0387911	0.0131623		0.00547365	0.0160532	0.00809976	0.000903788	0.0271333	0.00126222
