# Supplementary material for: Suppression of transcytosis regulates zebrafish blood-brain barrier function
Source: eLife. 2019 Aug 20;8:e47326. doi: 10.7554/eLife.47326 (PMC6726461; doi:10.7554/eLife.47326)
Supplement: Figure 5—source data 1. [file elife-47326-fig5-data1.xlsx]

## Sheet: Figure 5
	mfsd2aa +/+																	mfsd2aa hm37/hm37
1 kDa NHS midbrain	3.29088	2.90141	2.4097	2.41772	2.13152	2.64373	2.13541	2.32277	2.38655	2.28905	0.970063	4.9179	2.97569	4.7127	3.56545	0.92267		4.61856	5.98064	5.43869	6.01318	3.17996	3.92018	6.89764	6.38792	7.91613	10.5239	14.2974	11.1058	15.5934	8.72804	9.86908	12.571	4.68781	6.39649	5.86103
80 kDa DBP midbrain	4.8049	1.61249	4.93529	5.65844	3.28829	2.81719	3.17068	3.05274	4.63492	2.41595	1.51774	3.67299	3.02364	5.26862	5.92618	2.19083		3.26888	3.75174	8.6252	5.16907	14.2216	6.34994	9.16871	13.1061	8.30446	10.1907	9.34143	7.68129	6.62458	8.43855	2.80921	8.64756	8.38424	5.60705	7.62807
1 kDa NHS hindbrain	3.54843	2.8588	3.98604	3.69	2.98228	4.08095	2.14508	2.02686	2.55926	3.34249	0.846375	2.42855	1.81418	2.84147	1.14334	0.441076		6.55266	6.69366	3.63682	2.8717	5.39287	6.32689	7.87531	5.73268	5.92141	4.78137	5.73591	5.91694	5.71105	4.06685	4.46621	5.57518	1.84934	1.48979	2.1522
80 kDa DBP hindbrain	4.19769	1.87162	5.00099	5.48639	4.42041	3.51833	7.25103	4.16768	3.04409	1.55151	1.53776	5.41223	4.75285	7.07951	1.39381	5.14703		4.52354	4.31581	5.18843	3.72854	12.3598	6.46766	7.46143	9.52574	5.85094	9.25029	4.84901	4.40385	4.32157	13.3498	7.19697	12.2499	11.1727	14.0567	14.6467
Supplement 1
	mfsd2ab +/+												mfsd2ab hm38/hm38
1 kDa NHS midbrain	3.36196	4.17443	5.02711	3.97504	2.67894	3.92117	2.52813	3.65291	5.46354	2.49263	3.37		2.40749	2.49145	3.28603	5.14249	2.67366	4.57816	2.38845	3.22618	2.19914	3.34692	2.96096	3.75065
80 kDa DBP midbrain	1.66844	5.0492	4.42957	3.67499	2.03423	3.51773	3.33792	2.80268	1.234	2.4563	4.5294		3.90702	2.31791	3.35269	2.86598	3.49296	1.65815	3.08107	2.9763	4.36789	1.98723	3.7898	2.45632
1 kDa NHS hindbrain	2.45041	4.13192	4.79458	3.34148	1.92335	2.59802	2.53798	3.40965	4.77428	1.97678	2.64456		1.82484	2.11648	1.66215	5.14538	1.79676	4.45705	2.77908	2.27907	1.49751	3.55382	2.82637	3.38907
80 kDa DBP hindbrain	1.82483	3.89181	5.01406	2.37561	2.76298	2.75465	4.64493	3.44565	1.3496	2.332	3.89409		3.66719	4.05504	2.68325	2.38363	2.40063	3.70576	2.80824	3.3432	4.5896	1.5643	3.23211	2.7694
Supplement 2	uninjected										mfsd2aa crispants																							mfsd2ab crispants
DBP Midbrain	1.0456	1.12986	1.38522	1.814	2.03555	2.63274	3.61136	3.66748	4.74335		3.90705	5.1002	5.37638	6.06196	6.23443	6.67262	6.70754	7.0573	7.46387	7.7936	7.95351	8.32226	8.3611	9.43582	9.4695	9.66657	9.74863	10.1806	11.2485	11.9935	12.7944	13.5635		1.4893	1.51461	1.70573	1.86788	2.00114	2.00463	2.32055	2.32498	2.32837	2.5852	2.67422	2.8182	2.84629	3.11167	3.20449	3.28805
DBP Hindbrain	1.21022	1.50987	1.76312	1.87807	3.11174	3.13268	3.37688	4.21794	4.79642		2.92517	3.9023	3.95628	3.99085	4.37517	4.68173	5.09208	5.15558	5.26216	5.99387	6.05723	6.18614	6.29408	6.44768	6.44784	6.67874	6.87645	6.95173	7.46324	8.14297	8.4004	13.232		1.03605	1.04035	1.08099	1.11184	1.42093	1.68029	1.71738	1.75532	1.84234	1.99559	2.0454	2.0702	2.07077	2.70363	3.21847	3.2595
Supplement 3
	mfsd2aa +/+; mfsd2ab +/+								mfsd2aa hm37/hm37; mfsd2ab +/+								mfsd2aa +/+; mfsd2ab hm38/hm38								mfsd2aa hm37/hm37; mfsd2ab hm38/hm38
80 kDa DBP midbrain	4.4973	2.6699	2.9858	2.9207	1.4891	2.1742	1.3938	2.1842	8.0272	7.5226	6.6206	5.2198	5.4586	7.5392	5.1182	5.8198	3.6698	1.6299	2.2388	3.2941	2.1676	2.1651	1.9283	1.2156	9.7965	6.1039	8.3993	4.9239	6.7381	5.4839	4.0784
[truncated: 3 more columns]
