# Supplementary material for: Suppression of transcytosis regulates zebrafish blood-brain barrier function
Source: eLife. 2019 Aug 20;8:e47326. doi: 10.7554/eLife.47326 (PMC6726461; doi:10.7554/eLife.47326)
Supplement: Figure 6—source data 1. [file elife-47326-fig6-data1.xlsx]

## Sheet: Figure 6
	mfsd2aa +/hm37										mfsd2aa hm37/hm37
Time (s)	Fish 1	Fish 2	Fish 3	Fish 4	Fish 5	Fish 6	Fish 7	Fish 8	Fish 9		Fish 1	Fish 2	Fish 3	Fish 4	Fish 5	Fish 6	Fish 7	Fish 8	Fish 9	Fish 10
0	0	0	0	0	0	0	0	0	0		0	0	0	0	0	0	0	0	0	0
75	-0.254	0.6506	-1.742	0.444262	0.172359	0.073998	0.019945	0.196788	0.057221		-0.027	-0.44	-0.297	0.447746	0.249713	0.342328	-0.0279	0.047766	-0.24617	-0.04449
150	-0.637	0.5255	-2.48	0.35673	0.414011	0.248218	0.358387	0.620304	0.151396		0.0234	-0.289	-0.305	0.949947	0.948247	0.687723	0.198628	0.495962	-0.17607	-0.05488
225	-0.177	0.2233	-3.402	0.173332	0.696232	0.467225	0.622619	1.02289	0.247981		0.1135	0.2972	-0.412	1.29321	0.68294	0.47316	0.226603	1.20742	0.474723	0.049909
300	0.1688	0.0197	-4.263	0.032181	0.880194	0.780205	0.642763	1.02595	0.372185		0.1056	0.5141	-0.591	1.31858	0.897799	0.885164	0.601083	1.52635	1.05317	0.099878
375	-0.084	-0.074	-4.899	0.099369	1.14934	0.906202	0.87705	1.02922	0.435385		0.2186	0.9304	-0.724	1.35837	1.71183	1.38588	0.837068	1.86226	1.23167	0.243821
450	-0.418	-0.031	-5.187	0.0019328	1.34979	1.07129	0.956639	1.1702	0.523864		0.1591	1.5062	-0.915	1.41764	1.79675	1.00792	1.10697	2.05649	0.749113	0.417945
524	-0.566	0.1028	-5.403	-0.03795	1.4965	0.976573	1.16913	1.24933	0.649417		0.2785	1.6686	-0.823	1.5773	1.71528	1.08981	1.73287	2.18106	1.23844	0.700922
599	-0.678	0.4215	-5.702	0.074512	1.58897	1.13637	1.3751	1.68469	0.698503		0.3068	1.4544	-0.71	1.65716	1.62768	1.21341	2.0844	2.14821	1.44496	0.885726
674	-0.797	0.3739	-5.75	0.066541	1.68579	1.09882	1.58013	1.70038	0.811537		0.4326	1.3707	-0.492	2.55394	1.66464	1.3927	2.35092	2.76924	1.08371	1.14588
749	-0.905	0.6055	-5.97	-0.0343	1.78303	1.09779	1.80272	2.14987	0.911531		0.4208	1.6844	-0.335	4.47409	1.71303	1.95816	2.63373	3.28995	0.97297	1.40943
824	-0.958	0.7114	-6.013	-0.02509	1.44265	1.22218	1.92973	2.24982	1.00704		0.278	1.0971	0.0256	5.81759	1.81338	1.64533	2.89915	2.17834	1.12484	1.78606
899	-0.979	0.69	-6.05	0.260477	1.43358	1.05778	2.09782	2.72774	1.11227		0.1918	0.5175	0.2694	3.65769	1.79579	2.24252	2.99571	3.44366	1.46171	2.09844
974	-1.059	0.8258	-6.032	0.176258	1.50582	1.21995	2.2555	1.5602	1.3819		0.0571	0.4	0.4588	2.88932	2.04191	2.40929	3.83799	3.57766	1.91168	2.23514
1049	-1.097	0.8721	-5.988	0.231017	1.55791	1.18424	2.52038	0.934134	1.45144		-0.098	0.1929	0.7698	2.59954	2.19328	2.18596	4.1496	3.71166	2.06541	2.15898
1124	-1.04	0.9475	-5.845	0.248802	1.66688	1.1942	2.65878	0.450657	1.59413		-0.077	0.0391	1.0116	2.53022	2.7922	2.70374	4.4823	3.84566	2.14663	2.27733
1199	-1.134	0.961	-5.867	0.046568	1.73498	1.28373	2.60065	0.238297	1.61422		-0.099	0.1404	1.1805	2.82031	2.9152	2.54732	5.25682	3.97966	2.0093	2.20709
1274	-1.131	0.8948	-5.731	-0.11254	1.79327	1.19823	2.73355	-0.20549	1.67766		-0.144	0.0627	1.4763	3.00069	3.0382	2.63406	4.67765	4.08476	1.86492	2.16541
1349	-1.099	0.9391	-5.652	-0.32688	1.84692	1.19214	2.95104	-0.24761	1.71609		-0.07	0.1754	1.6435	3.2645	3.1612	2.72112	3.46924	4.21876	2.01279	2.16531
1423	-1.047	0.6769	-5.489	-0.21465	1.92775	1.27083	3.01443	-0.31265	1.78494		0.0234	0.392	2.0062	2.89662	3.2842	2.7594	3.49545	4.35276	2.15542	2.15295
1498	-1.012	0.7169	-5.313	-0.31092	1.97714	1.29735	3.12978	-0.40526	1.86111		0.1609	0.3893	2.0355	2.7645	3.4072	2.94001	2.90423	4.48676	2.20338	2.38136
1573	-0.986	0.5326	-5.213	-0.46355	2.00453	1.21413	3.20148	-0.26944	1.84711		0.3407	0.4927	2.0885	2.89662	3.5302	2.79214	2.8418	4.62076	2.25208	2.31409
1648	-1.049	0.5202	-5.084	-0.60518	2.09368	1.24222	3.22274	-0.39021	1.97556		0.5222	0.9127	2.135	3.42897	3.49002	3.16164	2.84631	4.42576	2.24816	2.40298
1723	-0.968	0.5292	-4.966	-0.55016	2.17201	1.13684	3.33623	-0.44771	2.06101		0.7449	1.2632	2.173	3.2645	3.61302	3.40322	2.76232	4.55976	2.31951	2.54056
1798	-0.991	0.546	-4.775	-0.35686	2.19556	0.979497	3.50945	-0.2952	2.07529		0.9364	1.5963	2.1627	3.38112	3.73602	3.31101	2.82966	4.69376	2.26108	2.63542
1873	-0.941	0.4115	-4.731	-0.34331	2.23417	0.900238	3.56801	-0.05798	2.11849		1.4493	1.8229	2.2635	2.8659	3.85902	3.59629	2.7264	4.76925	2.28588	2.85322
1948	-0.919	0.577	-4.447	0.157285	2.39275	0.772842	3.69867	0.178714	2.2155		1.8357	2.434	2.2971	2.20771	3.98202	3.85318	2.47096	4.90325	2.99202	2.84469
2023	-0.942	0.451	-4.293	0.901655	2.65315	0.750913	3.8694	0.373338	2.25138		2.0608	2.4473	2.4118	1.95509	4.34437	3.80021	1.99263	5.03725	2.45158	2.99727
2098	-0.856	0.3377	-4.173	1.63276	2.91057	0.693885	3.99418	0.274926	2.30967		1.3347	3.2999	2.5725	2.34105	4.01581	4.26899	1.85651	5.17125	2.67485	3.52854
2173	-0.893	0.1886	-3.984	1.36077	2.71701	0.63098	4.06696	0.537294	2.27807		1.3799	4.0201	2.6865	2.98358	3.99616	4.38714	1.84067	5.30525	2.82776	3.65703
2248	-0.911	0.184	-3.799	0.560683	2.36915	0.616067	4.24323	0.410962	2.42465		1.2711	3.9497	3.0121	4.00377	3.95797	4.64279	1.76448	5.26982	2.59556	3.83738
2322	-0.786	0.1659	-3.626	0.139394	2.27837	0.720205	4.40682	0.380644	2.41763		1.2939	3.3279	3.2764	4.57158	3.56803	4.52984	1.8067	5.03105	2.80244	3.82487
2397	-0.686	0.1157	-3.519	0.095554	2.17524	0.82174	4.36933	0.288544	2.41775		1.461	2.6043	3.3765	5.19779	3.78391	4.65157	1.89354	5.19	2.73247	3.91395
2472	-0.426	0.0916	-3.348	0.114031	2.20333	0.703893	4.2738	0.504761	2.41787		1.7386	2.5235	3.4	5.49633	3.39167	5.19884	1.96393	5.21824	2.94374	3.96425
2547	-0.38	0.17	-3.142	-0.002697	2.30466	0.749407	4.22821	0.492157	2.42085		1.9321	1.9637	3.5	5.6785	3.73865	4.99197	2.23129	4.59737	2.67437	4.06057
2622	-0.237	0.2251	-2.976	-0.04903	2.3333	0.795739	4.21316	0.631947	2.42382		2.1851	1.7136	3.6	6.13557	3.94644	4.40652	2.59811	4.30613	4.75322	4.24149
2697	-0.101	0.0942	-2.812	-0.005168	2.56423	0.824921	4.35329	0.649245	2.46168		2.3766	1.734	3.7	6.46887	3.89315	4.59773	2.79963	4.09899	3.58651	4.3861
2772	0.1838	0.1131	-2.677	0.060779	2.57835	0.87502	4.3042	0.63027	2.49954		2.5782	1.7903	3.7	6.93285	3.83182	5.0236	2.78607	4.67491	3.82875	4.58459
2847	0.4154	0.3202	-2.342	0.041499	2.57166	1.02189	4.35264	0.399972	2.553		1.7638	1.8269	3.8	7.55681	3.96827	5.07249	3.0303	4.92356	4.08419	4.64987
2922	0.1339	0.0681	-2.241	0.214266	2.64502	1.19051	4.46511	0.693655	2.60645		1.7361	1.837	3.8993	8.28514	4.13751	5.43926	3.17599	5.51284	4.25324	5.50235
2997	-0.177	0.2118	-3.142	0.221266	1.77309	1.29858	4.53013	0.667265	2.6452		1.7225	2.1873	3.8993	9.09274	4.62463	5.77024	3.36541	5.79273	4.45322	5.58071
3072	-0.163	0.1998	-2.976	0.104412	1.82199	1.41395	4.68752	0.670999	2.68395		1.8936	2.4833	4.3373	9.75515	5.01308	6.13728	3.21513	5.74398	4.75322	5.779
3147	-0.297	0.1216	-2.812	0.039696	1.92922	1.60479	4.91898	0.883756	2.70254		2.339	2.775	4.6192	10.5136	5.35854	6.46035	3.48947	6.09997	5.74743	6.09989
3221	-0.306	0.1815	-2.677	-0.04396	1.94728	1.63251	5.01447	1.11	2.72114		2.2955	2.8107	4.9782	10.7353	5.78707	7.30421	3.55358	5.74743	6.23236	6.29119
3296	-0.441	0.3007	-2.342	0.20406	2.13772	1.93233	5.21109	1.23545	2.82963		2.8761	3.3115	5.3441	11.6249	6.7331	7.57299	3.67077	6.23236	6.56425	6.70554
3371	-0.356	0.4272	0	0.02389	2.31031	2.1151	5.22387	1.24151	2.93813		3.2239	4.5375	5.54	12.0379	7.24536	8.79785	3.75278	6.56425	6.2349	6.87212
3446	-0.124	0.3308	0	0.211002	3.55699	2.31284	5.22963	1.80476	3.04372		3.4772	8.0957	5.782	12.4354	7.80715	8.60436	4.09247	6.2349	7.00237	7.16559
