# Supplementary material for: Suppression of transcytosis regulates zebrafish blood-brain barrier function
Source: eLife. 2019 Aug 20;8:e47326. doi: 10.7554/eLife.47326 (PMC6726461; doi:10.7554/eLife.47326)
Supplement: Figure 7—source data 1. [file elife-47326-fig7-data1.xlsx]

## Sheet: Figure 7
	mfsd2aa +/+						mfsd2aa hm37/hm37
Forebrain	6.78084	6.03048	3.07864	7.72686	5.40275		22.0242	21.7813	18.0592	22.3838	15.3969
Midbrain	5.16664	5.5232	6.17425	4.25747	3.29586		14.573	15.5125	24.3771	17.7258	18.4404
Hindbrain	4.53993	7.7425	5.36831	4.42414	6.30512		16.3681	24.1457	21.8211	19.0068	17.6874
