# Supplementary material for: Suppression of transcytosis regulates zebrafish blood-brain barrier function
Source: eLife. 2019 Aug 20;8:e47326. doi: 10.7554/eLife.47326 (PMC6726461; doi:10.7554/eLife.47326)
Supplement: Figure 8—source data 1. [file elife-47326-fig8-data1.xlsx]

## Sheet: Figure 8
Luminal Vesicles									Abluminal Vesicles
mfsd2aa +/+				mfsd2aa hm37/hm37					mfsd2aa +/+				mfsd2aa hm37/hm37
0	0	0	0	0.0858663	0.141862	0.101535	0.100594		0	0	0	0	0.0510461	0.107856	0.170567	0.0894942
0	0	0	0	0.133921	0.15373	0.102875	0.17481		0	0	0.0223284	0	0.139107	0.187064	0.1848	0.100594
0	0	0	0	0.201823	0.159381	0.154496	0.18386		0.0832123	0.061591	0.037262	0	0.143111	0.199587	0.192163	0.11654
0.0295512	0	0.0254772	0.069247	0.212131	0.170567	0.172747	0.193277		0.0868963	0.064659	0.0569793	0.044703	0.145695	0.203069	0.236613	0.122573
0.0554748	0.054136	0.0365213	0.070701	0.213125	0.176709	0.23099	0.214218		0.0892016	0.083161	0.059003	0.052405	0.149362	0.205751	0.261151	0.17556
0.0707327	0.064349	0.0725003	0.08188	0.221437	0.202354	0.249419	0.263359		0.0920269	0.088559	0.069074	0.061816	0.17715	0.221747	0.270241	0.175573
0.0920269	0.079671	0.0745239	0.092435	0.242824	0.23357	0.266116	0.273965		0.11793	0.100844	0.0729923	0.06227	0.189613	0.271959	0.279653	0.195994
0.0988474	0.080742	0.102023	0.096761	0.251682	0.267655	0.271959	0.291843		0.124835	0.102941	0.0838453	0.067764	0.205063	0.288334	0.280264	0.214616
0.112489	0.084648	0.113959	0.112651	0.28672	0.302856	0.286257	0.357977		0.179199	0.110653	0.0989344	0.068766	0.216666	0.28866	0.282704	0.228304
0.124835	0.102941	0.15001	0.123862	0.297167	0.349984	0.289048	0.361082		0.200006	0.128697	0.111315	0.077857	0.222229	0.289048	0.283723	0.241597
0.164373	0.10873	0.157181	0.130011	0.322224	0.353098	0.297512	0.381676		0.213021	0.137183	0.1122	0.084947	0.235152	0.307987	0.305754	0.242883
0.170574	0.12385	0.16576	0.148478	0.393898	0.361191	0.310411	0.384135		0.2433	0.161484	0.128909	0.118699	0.24322	0.310411	0.325774	0.253498
0.212755	0.125341	0.202855	0.174669	0.394115	0.382821	0.356195	0.418616		0.282931	0.188011	0.159481	0.124719	0.315119	0.324163	0.377122	0.295245
0.213021	0.257437	0.214379	0.175193	0.409154	0.394217	0.360825	0.441945		0.296128	0.205137	0.178536	0.140403	0.355632	0.474926	0.466524	0.389124
0.267605	0.274366	0.239221	0.260848	0.452269	0.479242	0.589728	0.614895		0.446886	0.208646	0.450029	0.145847	0.358509	0.51824	0.559882	0.614895
				0.491415	0.540482		0.676471						0.523154		0.618986	0.676471
Supplement 1
Luminal Vesicles									Abluminal Vesicles
mfsd2ab +/+				mfsd2ab hm38/hm38					mfsd2ab +/+				mfsd2ab hm38/hm38
0	0	0	0	0	0	0	0		0.0509138	0	0.0957488	0	0.102187	0	0.0650449	0
0	0	0.185014	0	0	0	0	0		0.254055	0	0	0	0.415844	0.178384	0.13468	0
0.00762951	0.0625704	0.166368	0.0545258	0	0	0	0		0.187207	0.0506022	0	0	0	0.00776018	0.0617665	0.0682408
0.059673	0.0650787	0.11258	0.0663911	0.0590807	0.0595026	0	0		0.192115	0.0521884	0	0.256904	0.202737	0	0	0
0.0611396	0.0844309	0.0872829	0.0883781	0.0636132	0.0712048	0	0		0	0.0725005	0	0	0.244349	0	0.139431	0.140984
0.0613572	0.10014	0	0.0924296	0.0697837	0.0860289	0	0		0	0.105197	0	0	0	0.0541008	0.348413	0.276203
0.0711541	0.107009	0.357185	0.102033	0.0841893	0.0897022	0.0516369	0.0779484		0	0.110656	0	0.265196	0.077688	0.101266	0.157233	0.154787
0.0778331	0.112271	0	0.122334	0.120613	0.0937734	0.0925069	0.102673		0	0.119446	0.214408	0.0642261	0.165117	0.0984834	0	0
0.0880747	0.118092	0	0.123877	0.126855	0.12374	0.093668	0.103157		0	0.119489	0.125786	0.136513	0.0902527	0.136295	0.377825	0.100756
0.0982415	0.13181	0.173165	0.129778	0.136129	0.178126	0.113711	0.130157		0.230057	0.171174	0.0912326	0	0.125313	0.0568828	0.122594	0.253904
0.131891	0.13421	0.372374	0.168549	0.136482	0.18151	0.117299	0.137023		0.101111	0.182815	0	0.0704722	0	0	0	0.334821
0.131978	0.169334	0.0623364	0.182719	0.162584	0.262055	0.118694	0.165676		0.164102	0.218489	0.0935716	0.185693	0.183932	0.057346	0.325197	0.201261
0.172369	0.244497	0.193574	0.182976	0.20496	0.28033	0.220013	0.235849		0.21875	0.220216	0.115942	0.0871612	0.24252	0.134662	0.175603	0.189484
0.186359	0.25619	0.0870853	0.308754	0.215608	0.322235	0.239812	0.280906		0.127891	0.224065	0.124677	0.162694	0.0801154	0	0.0603646	0.0714694
0.381052	0.29991	0.243807	0.509214	0.312111	0.438148	0.351987	0.287335		0.0808745	0.282514	0.091166	0.0516742	0.174366	0.123153	0.203128	0.147096
